20 **Abstract**

21 Astronauts returning from spaceflight typically show transient declines in mobility and  
22 balance. These whole-body postural control behaviors have been investigated thoroughly, while  
23 study of the effects of spaceflight on other sensorimotor behaviors is prevalent. Here, we tested  
24 the effects of the spaceflight environment of microgravity on various sensorimotor and cognitive  
25 tasks during and after missions to the International Space Station (ISS). We obtained mobility  
26 (Functional Mobility Test), balance (Sensory Organization Test-5), bimanual coordination  
27 (bimanual Purdue Pegboard), cognitive-motor dual-tasking and various cognitive measures  
28 (Digit Symbol Substitution Test, Cube Rotation, Card Rotation, Rod and Frame Test) before,  
29 during and after 15 astronauts completed 6+ month missions aboard the ISS. We used linear  
30 mixed effect models to analyze performance changes due to entering the microgravity  
31 environment, behavioral adaptations aboard the ISS and subsequent recovery from  
32 microgravity. We identified declines in mobility and balance from pre- to post-flight, suggesting  
33 possible disruption and/or downweighting of vestibular inputs; these behaviors recovered to  
34 baseline levels within 30 days post-flight. We also identified bimanual coordination declines from  
35 pre- to post-flight and recovery to baseline levels within 30 days post-flight. There were no  
36 changes in dual-task performance during or following spaceflight. Cube rotation response time  
37 significantly improved from pre- to post-flight, suggestive of practice effects. There was a trend  
38 for better in-flight cube rotation performance on the ISS when crewmembers had their feet in  
39 foot loops on the “floor” throughout the task. This suggests that tactile inputs to the foot sole  
40 aided orientation. Overall, these results suggest that sensory reweighting due to the  
41 microgravity environment of spaceflight affected sensorimotor performance, while cognitive  
42 performance was maintained. A shift from exocentric (gravity) spatial references on Earth  
43 towards an egocentric spatial reference may also occur aboard the ISS. Upon return to Earth,

## BEHAVIORAL EFFECTS OF SPACEFLIGHT

3

44 microgravity adaptations become maladaptive for certain postural tasks, resulting in transient  
45 sensorimotor performance declines that recover within 30 days.

46

47

48

49

50

51

52

53

54

55

56

57

58

59 **1. Introduction**

60 There are well-documented changes in human sensorimotor performance following  
61 spaceflight, including post-flight declines in locomotion, balance, and fine motor control  
62 (Thornton & Rummel, 1977; Paloski et al., 1992; 1994; Reschke et al., 1994a; 1994b; 1998;  
63 Black et al., 1995; McDonald et al. 1996, Bloomberg et al. 1997; Newman et al. 1997; Layne et  
64 al. 1998; 1999; Bock et al., 2003; Campbell et al., 2005; Rafiq et al. 2006). However, the effects  
65 of spaceflight on human cognition and other motor behaviors have not been as thoroughly  
66 investigated (Strangman et al., 2014; Garrett-Bakelman et al., 2019). Performance of whole-  
67 body postural control typically returns to pre-flight levels within approximately two weeks of  
68 return to Earth (Wood et al., 2015; Ozdemir et al., 2018), however it is not clear whether the  
69 same is true for other sensorimotor or cognitive behaviors.

70 Vestibular inputs are altered during spaceflight; in particular, otolith (the small structure  
71 within the inner ear that senses linear accelerations and tilt) signaling of head tilt, which relies  
72 upon gravity is absent and likely gets down weighted (Reschke et al., 1994a; 1994b; 1998;  
73 Paloski et al., 1992; 1994; Black et al., 1995; 1999; Clément et al., 2020). The central nervous  
74 system adapts to altered vestibular inputs in-flight due to microgravity with as little as 2 weeks  
75 spent in spaceflight (Layne et al., 1998). Upon return to Earth however, these adaptive changes  
76 may become maladaptive, resulting in difficulties with whole-body motor control. Post-flight  
77 impairments in locomotion (Mulavara et al., 2018; Miller et al., 2018; Layne et al., 1998;  
78 McDonald et al., 1996; Bloomberg et al., 1997), balance (Reschke et al., 1994a; 1994b; 1998;  
79 Paloski et al., 1992; 1994; Black et al., 1995; 1999), jumping (Newman et al. 1997), obstacle  
80 navigation (Mulavara et al., 2010; Bloomberg et al. 2015), and eye-head coordination (Reschke  
81 et al., 2017) have been reported. Neural processing and motor control re-adapt to the presence  
82 of Earth's gravity in the weeks following return, with performance returning to pre-flight levels

83 with about 6 days on a variety of functional tasks (Miller et al., 2018) to 15 days for the  
84 functional mobility test (FMT; Mulavara et al., 2010).

85 In-flight changes in performance of fine motor tasks have also been identified. For  
86 instance, astronauts maintained their manual dexterity while performing survival surgery on rats  
87 during a Neurolab shuttle mission. However, there was a significant increase in operative time,  
88 in some cases taking 1.5 to 2 times longer than on Earth (Campbell et al., 2005), which may be  
89 indicative of a speed-accuracy trade-off. Indices of movement variability, reaction time, and  
90 movement duration also increased on a hand pointing task executed without visual feedback  
91 during Neurolab Space Shuttle missions (Bock et al., 2003), in addition to a significant increase  
92 in movement amplitude shortly following landing. During Skylab missions, impairments in  
93 reaching and grasping were also documented (Thornton & Rummel, 1977). Additionally,  
94 decreases in both force regulation and performance quality while tying surgical knots were  
95 identified in the low gravity phase of parabolic flight (Rafiq et al. 2006). Recently, it has been  
96 shown that long duration spaceflight results in decreases in fine motor control, as seen by an  
97 increase in completion time on a grooved pegboard test (Mulavara et al., 2018). Here we  
98 evaluate bimanual motor coordination pre- and post-flight using the bimanual Purdue Pegboard  
99 Test.

100 Several spaceflight stressors have the potential to impact cognition in-flight, including  
101 sleep loss, motion sickness, and social isolation. Astronauts anecdotally report so-called “space  
102 fog”, including attention lapses, short term memory problems, confusion, and psychomotor  
103 problems (Clément et al. 2020). Previous investigations into characterizing the cognitive effects  
104 of spaceflight have failed to strongly support or refute such effects (c.f. Strangman et al., 2014).  
105 One study showed, however, an increased ability to mentally rotate the visual image of their  
106 environment as their exposure to microgravity increased, yet also a decreased ability in spatial  
107 orientation of written letters during the first 5 days in-flight (Clément et al., 1987). They posit that

108 the disappearance of a reference field (e.g. the ground) may affect the central representation of  
109 movements.

110           There have also been reported declines in the ability to perform simultaneous cognitive  
111 and motor dual-tasking in-flight (Manzey et al. 1995; 1998). The authors suggested that an  
112 increased demand for cognitive control of movement in microgravity may interfere with  
113 simultaneous cognitive task performance. This was further supported by Bock et al. (2010), who  
114 found higher tracking error in-flight in both the single and dual-task conditions and higher dual-  
115 task cost in a rhythm production reaction-time task compared to a visuospatial reaction-time  
116 task and a choice reaction-time task. The authors suggest that this may be due to a scarcity of  
117 resources required for complex motor programming due to sensorimotor adaptation to  
118 microgravity. Dual-tasking deficits in astronauts post-flight were also identified when astronauts  
119 were measured in a tracking task whilst responding and entering numerical codes with their  
120 non-dominant hand (Moore et al., 2019). In addition, NASA's "twins study" also showed  
121 increased risk-taking on a cognitive task throughout spaceflight, as well as decreased accuracy  
122 in a visual object learning task, decreased abstract shape matching, and decreased cognitive  
123 speed for all measures on a subset of tasks from the Penn Computer Neurocognitive Battery,  
124 except for the digit symbol substitution task post-flight (Garrett-Bakelman et al., 2019). However,  
125 the twins study only tested one astronaut in-flight and compared performance to that of their  
126 Earth bound twin, and other previous investigations similarly had small sample sizes (Manzey et  
127 al., 1995; 1998; Bock et al., 2010). It remains unclear whether or how cognitive function is  
128 impacted by spaceflight. Spaceflight analog environments, such as extended isolation, reduced  
129 spatial cognition (Stahn et al., 2019) and head-down tilt bedrest (HDBR) have shown to result in  
130 an overall cognitive slowing (Basner et al., 2021). Moreover, spatial orientation and distance  
131 estimation are impaired by both the hypergravity and microgravity phases of parabolic flight

132 (Clément et al., 2016). Thus, here we also evaluated performance on a range of cognitive  
133 assessments pre- and post-flight.

134 As NASA's goal shifts from the International Space Station (ISS) to the Moon and Mars,  
135 mission duration will increase. It is imperative to understand how other factors may interact with  
136 microgravity to affect sensorimotor and cognitive function, particularly flight duration, age and  
137 sex. Exploration missions to Mars surface are estimated to take around 30 months in total  
138 (Clément et al., 2019), making it important to understand how mission duration interacts with  
139 changes in sensorimotor and cognitive function with spaceflight. Associations between mission  
140 duration and the magnitude of brain structural changes, free water shifts, and ventricular  
141 enlargement have been previously reported (Hupfeld et al., 2020a; Roberts et al., 2017; Alperin  
142 2017). There is also evidence that longer flight duration results in prolonged brain and behavior  
143 recovery profiles (Bryanov et al. 1976; Hupfeld et al. 2020a). Flight duration may also be  
144 correlated with the magnitude of sensorimotor and cognitive changes that occur with  
145 spaceflight, or that effects of flight duration may be due to an interaction of microgravity with  
146 isolation and confinement hazards.

147 As age increases, sensorimotor adaptability declines (Seidler et al., 2010; Anguera et  
148 al., 2011). Astronaut training requires years to complete and the average age for an astronaut at  
149 the onset of their first mission is 39.8 ( $\pm 5.28$ ) years (Smith et al., 2020). It is important to  
150 consider the impact of age on behavioral and brain changes in spaceflight, thus we include age  
151 as a model covariate for exploratory purposes. Sex differences in the effects of microgravity  
152 have rarely been considered (as the Astronaut Corps has been historically male (Reschke et al.,  
153 2014)), but with the future Artemis program having equal representation of the sexes, it is  
154 imperative to identify any sex related differences. While our sample size of 15 astronauts is not  
155 large enough for a well-powered investigation of sex effects, we include sex as a model  
156 covariate for exploratory purposes.

157           Here we aimed to investigate the spaceflight impacts on sensorimotor and cognitive  
158 performance. We included several assessments of whole-body sensorimotor behaviors  
159 including the Functional Mobility Test (FMT) and Sensory Organization Test-5 (SOT-5)  
160 implemented using computerized dynamic posturography. We also assessed fine motor control  
161 using the bimanual Purdue Pegboard Test. Finally, we assayed multiple aspects of cognitive  
162 function including processing speed, mental rotation, spatial working memory and cognitive-  
163 motor dual-tasking. Most tests were administered pre- and post-flight, with a subset of the test  
164 battery performed on three occasions on the ISS. Follow-up performance measurements were  
165 obtained over six months post-flight to characterize the trajectory of re-adaptation following  
166 return to Earth.

167           We hypothesized, based on prior trajectories of change (Mulavara et al., 2010; Wood et  
168 al., 2015), performance on all sensorimotor tasks would decline from pre- to post-flight, and then  
169 recover to pre-flight levels within one month. We further hypothesized that performance on  
170 cognitive tasks would decrease from pre- to post-flight, with a similar recovery profile as  
171 sensorimotor tasks. Finally, we hypothesized that astronauts' sensorimotor and cognitive (dual-  
172 tasking, spatial working memory) performance would be disrupted following their arrival to the  
173 ISS, and would then resolve throughout the flight as they adapted to microgravity.

174

## 175       2. Materials & Methods

### 176       2.1 Participants

177           Fifteen astronauts participated in this study (Table 1). One withdrew from the study prior  
178 to their last post-flight data point. The mean age at launch in this study was 47.46 years ( $\pm$   
179 6.28). 26% of the participants were female. Mission duration to the ISS lasted an average of



180 188.13 days ( $\pm$  57.46). Six astronauts had previous flight experience, having spent an average  
181 of 75 days ( $\pm$  131.36) in space across an average of 0.8 ( $\pm$  1.15) previous missions. An average  
182 of 5.77 years ( $\pm$  1.6) had elapsed since the end of their previous mission. The University of  
183 Michigan, University of Florida, and NASA Institutional Review Boards approved all study  
184 procedures. All participants provided their written informed consent. This study was  
185 implemented as part of a larger NASA-funded project (NASA #NNX11AR02G) aiming to  
186 investigate the extent, longevity, and neural bases of long-duration spaceflight-induced changes  
187 in sensorimotor and cognitive performance (Koppelmans et al., 2013).

## 188 2.2 Behavioral Assessments

### 189 2.2.1 Sensorimotor Measures

#### 190 2.2.1.1. Whole-body postural and locomotor control

191 To assess performance changes in relation to spaceflight for whole-body postural  
192 control, we administered several balance and locomotion tests. We used the Functional Mobility  
193 Test (FMT; Mulavara et al. 2010) to assess ambulatory mobility. This test was designed to  
194 assess movements similar to those required during spacecraft egress, which are measured by  
195 total completion time. The FMT is a 6 x 4 m obstacle course that requires participants to step  
196 over, under and around foam obstacles and change heading direction. Participants start from an  
197 upright seated position, buckled into a 5-point harness. After releasing their harness and  
198 standing up, they walked on a firm surface for the first half of the test and on a medium density  
199 foam for the second half. This compliant foam makes surface support and proprioceptive inputs  
200 unreliable (Mulavara et al., 2010). Astronauts performed the FMT 10 times as quickly as  
201 possible. For analysis purposes we only analyzed completion time on the first trial to minimize  
202 the effects of task learning.

203           Dynamic postural control was assessed using Computerized Dynamic Posturography  
204 (Equitest, NeuroCom International, Clackamas, OR; Reschke et al., 2009). Specifically,  
205 astronauts completed the Sensory Organization Test-5 (SOT-5 and SOT-5M). We administered  
206 SOT-5, in which the eyes are closed and the platform is sway-referenced, forcing greater  
207 reliance on vestibular inputs. We also administered SOT-5M, in which participants make  $\pm 20^\circ$   
208 head pitch movements at 0.33 Hz paced by an auditory tone (Wood et al., 2012). At each pre-  
209 and post-flight time point, we administered three trials of the SOT-5 and SOT-5M. Equilibrium  
210 Quotient scores were derived from peak-to-peak excursion of the center of mass (estimated at  
211 55% of total height) over a 20-second trial (Nashner, 1972; Paloski et al., 1992). As in our  
212 previous work, we used the median Equilibrium Quotient score from each time point in all  
213 statistical analyses (Lee et al., 2019).

#### 214 2.2.1.2. Fine motor control

215           To assess bimanual coordination, we used the bimanual Purdue Pegboard Test (Tiffin &  
216 Asher, 1948). The bimanual Purdue Pegboard Test is a well validated measure of bimanual  
217 manual dexterity. Participants were instructed to place 15 small metal pegs into fitted holes. We  
218 used their completion time to place all the pegs with both hands for statistical analysis.

#### 219 2.2.2. Cognitive measures

##### 220 2.2.2.1. Cognitive-Motor Dual-Tasking

221           We assessed dual-tasking using a motor and a cognitive task, both separately and  
222 simultaneously. The motor task required the participant to perform a choice button press, of two  
223 possible buttons, when an “X” was displayed in one of two boxes positioned on either side of the  
224 computer screen, cueing the participants to press the button on the corresponding side. The  
225 cognitive task required participants to monitor a separate box, positioned directly above the

226 button press indicating boxes, that rapidly changed colors and to count the number of times that  
227 the box turned blue (this occurred infrequently relative to other colors, making this akin to an  
228 oddball detection task). Each task was performed alone in a single task (ST) conditions as well  
229 as together in a dual-task (DT) condition. Performance declines between single to dual-task  
230 conditions are frequently referred to as dual-task cost (DTC). DTC has been shown to be a  
231 marker of resource limitation for task performance (Tombu & Jolicoeur, 2003) and served as  
232 our performance metric, calculated as the change when dual-tasking relative to single tasking  
233  $((DT - ST)/ST * 100)$ . Higher DTC during spaceflight would suggest more interference and  
234 higher processing loads. We have previously used this task to analyze dual-tasking changes in  
235 HDBR analog environments (Yuan et al., 2016).

#### 236 2.2.2.2. Spatial working memory

237 We used three task to assess spatial working memory; 1) a spatial working memory task  
238 (SWM; Anguera et al., 2010), 2) Thurstone's 2D card rotation test (Ekstrom et al., 1976) and 3)  
239 three-dimensional cube figure mental rotation task (Shepard & Metzler, 1988). During the SWM  
240 task, participants were instructed to mentally connect three dots that formed the points of a  
241 triangle. Then, after a 3000ms retention phase three new dots would appear on the screen and  
242 the participant must decide if they form the same triangle, but rotated, or a different triangle.  
243 Participants also performed a control task in which they were shown three dots forming a  
244 triangle and then, following a 500ms retention phase, one dot appeared and they would identify  
245 if that dot was one of the original three (Anguera et al., 2010; Salazar et al., 2020). We collected  
246 30 trials of each task. For both tests, we used the response time and number of correct  
247 responses as our outcome measures. During the 2D card rotation task, participants first were  
248 presented with a 2D drawing of an abstract shape. Then they were presented with another  
249 drawing and were instructed to identify if it was the same shape rotated or a different shape (the  
250 original shape mirrored or altogether different) (Ekstrom et al., 1976; Salazar et al., 2020). The

251 completion time, amount completed and accuracy were recorded and utilized for analyses.  
252 Finally, the cube rotation task had participants observe a 3D cube assembly for 3 seconds.  
253 Following a 2 second retention phase, two new cube assemblies would appear on the screen  
254 and the participant was instructed to identify which of the two matched the initial target image  
255 (Shepard & Metzler, 1988; Salazar et al., 2020). Reaction time and accuracy were analyzed for  
256 this task. The 3D cube rotation task was administered twice per session while in spaceflight; it  
257 was first performed with participants free floating in microgravity (referred to as Cube 1, tethered  
258 to a workstation), then with the crewmember in a posture that mimics a seated position with the  
259 feet on the “floor” in foot loops (referred to as Cube 2).

#### 260 2.2.2.3. Rod and Frame Test

261 Visual field dependence was assessed with the Rod and Frame Test (RFT); in which the  
262 participant looks into a “tunnel” (to remove peripheral visual cues) and attempts to align a rod to  
263 Earth vertical. This has been shown to identify visual-vestibular interactions (Witkin & Asch,  
264 1948). Outcome measures for the RFT were frame effect, measured as the angular deviation  
265 between the participants perceived vertical and true vertical, and the response consistency  
266 (sometimes referred to as response “variability”, although in the present work we will refer to this  
267 metric as response consistency).

#### 268 2.2.2.4. Digit Symbol Substitution Task

269 We utilized the Digit Symbol Substitution Test (DSST) to analyze cognitive processing  
270 speed. During this task the participants were presented with a sheet of paper that required  
271 them to match numbers with symbols according to a key that is provided at the top of the page  
272 (Wechsler, 1986). We measured completion time and the number correct as outcome  
273 measures for analysis.

274 2.3 Testing Timeline

275 As shown in Figure 1, astronauts performed all behavioral tasks prior to launch (180 and  
 276 60 days pre-flight), and four times following their return to Earth (approximately 4, 30, 90, and  
 277 180 days post-flight);. The initial testing point of 180 days before launch (L-180) was used as a  
 278 familiarization session and was not included in the analyses here. Sensorimotor (FMT, SOT-5,  
 279 SOT-5M and Bimanual Pegboard) and cognitive (DSST, Card Rotation, RFT, SWM, and dual-  
 280 tasking) tasks were all measured 60 days before flight and then within a few days of returning to  
 281 Earth to elucidate the effects of long-term microgravity exposure. SOT-5 and SOT-5M data had  
 282 an additional data collection time point approximately one day following post-flight. These same  
 283 measures were all recorded over the following six months post-flight to allow us to investigate  
 284 recovery from any performance changes due to spaceflight and the microgravity environment.  
 285 Post-flight testing sessions occurred between 1 to 7 days after landing; to account for this, the  
 286 time difference between landing and the first post-flight time point was used as a model  
 287 covariate in analyses. In addition, a subset of tasks (cube rotation and dual-tasking) were  
 288 collected three times during spaceflight (FD (Flight Day) 30, FD90 and FD150); this allowed us  
 289 to determine the direct effects of microgravity on performance of these tasks.

290 **Table 1: Tasks and data collection time points**

| Sensorimotor Task | Measure              | L-60 | FD30 | FD90 | FD180 | R+1 | R+4 | R+30 | R+90 | R+180 |
|-------------------|----------------------|------|------|------|-------|-----|-----|------|------|-------|
| Pegboard          | Completion Time (s)  | X    |      |      |       |     | X   | X    | X    | X     |
| FMT               | Completion Time (s)  | X    |      |      |       |     | X   | X    | X    | X     |
| SOT-5             | Equilibrium Quotient | X    |      |      |       | X   | X   | X    | X    | X     |
| SOT-5M            | Equilibrium Quotient | X    |      |      |       | X   | X   | X    | X    | X     |

BEHAVIORAL EFFECTS OF SPACEFLIGHT

| Cognitive Task | Measure              | L-60 | FD30 | FD90 | FD180 | R+1 | R+4 | R+30 | R+90 | R+180 |
|----------------|----------------------|------|------|------|-------|-----|-----|------|------|-------|
| DSST           | Completion Time (s)  | X    |      |      |       |     | X   | X    | X    | X     |
| Card Rotation  | Completion Time (s)  | X    |      |      |       |     | X   | X    | X    | X     |
|                | Correct (#)          | X    |      |      |       |     | X   | X    | X    | X     |
|                | Completed (%)        | X    |      |      |       |     | X   | X    | X    | X     |
| RFT            | Response Consistency | X    |      |      |       |     | X   | X    | X    | X     |
|                | Frame Effect         | X    |      |      |       |     | X   | X    | X    | X     |
| Cube Rotation  | Completion Time (s)  | X    | X    | X    | X     |     | X   | X    | X    | X     |
|                | Correct (#)          | X    | X    | X    | X     |     | X   | X    | X    | X     |
| DTC            | Tap (#)              | X    | X    | X    | X     |     | X   | X    | X    | X     |
|                | Reaction Time (s)    | X    | X    | X    | X     |     | X   | X    | X    | X     |
|                | Count (#)            | X    | X    | X    | X     |     | X   | X    | X    | X     |
| SWM Rotation   | Correct (#)          | X    |      |      |       |     | X   | X    | X    | X     |
| SWM Control    | Correct (#)          | X    |      |      |       |     | X   | X    | X    | X     |

291 **Table 1 Note.** L-60 refers to the pre-flight data collection point acquired at approximately 60 days prior to launch. FD  
 292 days refers to the approximate flight day during the astronaut’s mission on which they performed the task. R+ days  
 293 refers to the number of days following landing. All tasks were collected pre-flight (at L-60) and post-flight (at R+4, 30,  
 294 90 and 180). Cube rotation and DTC were also conducted while in-flight (FD30, 90 and 180). The two balance tasks  
 295 (SOT-5 and SOT-5M) had one additional collection time point immediately following return (at R+1). The measure  
 296 column refers to the primary outcome metric(s) of interest used in our statistical models.

297 Abbreviations: DSST: digit symbol substitution test; RFT: rod and frame test; DTC: dual task cost; RT: reaction time;  
298 SWM: spatial working memory; FMT: Functional Mobility Test; SOT-5: Sensory Organization Test 5; SOT-5M:  
299 Sensory Organization Test 5 with head movement; EQ Score: Equilibrium Quotient score

300

301

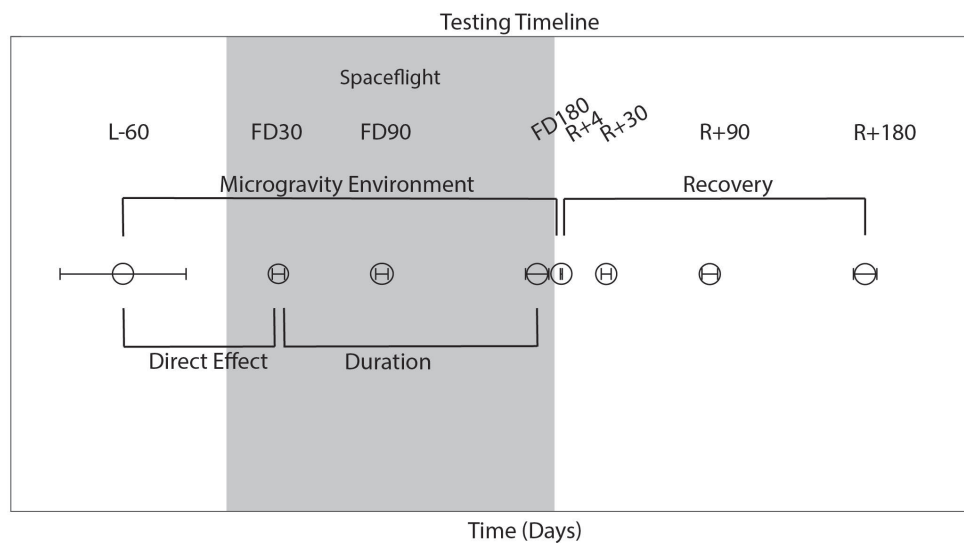

302

303 *Figure 1. Testing Timeline. L: Launch, R: Return, FD: Flight Day, time spent during spaceflight. Launch occurred on*  
304 *day 0. The average day of data collection is plotted relative to launch, with error bars indicating standard deviation.*

305

306

### 307 2.2.3. Statistical Analyses

308 We used the nlme package (Pinheiro et al., 2020) in R 3.6.1 (R Core Team, 2019) to fit  
309 linear mixed effects models with restricted maximum likelihood (REML) estimation for  
310 performance changes over time. In each model subject we entered subject as a random

311 intercept to allow for different starting points for each person (as in our previous work  
312 Koppelmans et al., 2017). Specifically, our first model evaluated the effect of the microgravity  
313 environment, testing for pre-flight (L-60) to post-flight (R+1/R+4) changes. Our second model  
314 evaluated the recovery from the microgravity environment, testing for changes across post-flight  
315 time points (R+1/R+4, R+30, R+90, R+180) in measures that showed significant change pre- to  
316 post-flight. Our third model evaluated the direct effects of microgravity, testing for performance  
317 changes from pre-flight (L-60) to the first in-flight test day (FD30). Our final model evaluated the  
318 effects of duration aboard the ISS, testing for changes in performance across the three in-flight  
319 test sessions (FD30, FD90, FD150) on select measures. For 3 of the 17 (Card rotation  
320 completed, Tap DTC & Count DTC) measures analyzed, the residuals were not normally  
321 distributed. We addressed this by log transforming the data prior to statistical analyses (Ives,  
322 2015), however for these three measures transformation did not normally distribute the  
323 residuals. Given this, the results of the Card rotation number completed, Tap DTC & Count DTC  
324 measures should be interpreted with caution. To account for multiple comparisons, we corrected  
325  $p$ -values within each of the models using the Benjamini-Hochberg false discovery rate (FDR)  
326 correction (Benjamini & Hochberg, 1995); we present the FDR-corrected  $p$ -values in Tables 2-5.  
327 Model 1) The effect of the microgravity environment

328 In this model, we considered time as a (fixed effect) categorical variable (pre-flight  
329 versus post-flight). We were primarily interested in the statistical significance of this categorical  
330 variable (i.e. whether any pre-flight to post-flight changes in performance occurred). We  
331 adjusted for the timing variability of the first post-flight session day (R+1 or R+4) by including the  
332 (mean-centered) time between landing and the first post-flight session as a covariate, as re-  
333 adaptation likely begins as soon as astronauts return to Earth. Mean centered age at launch,  
334 sex, and total flight duration were also entered into the model as covariates.



335 Model 2) Recovery from the microgravity environment

336 This model was only applied for measures where we observed significant changes from  
337 pre- to post-flight in model 1, in order to assess post-flight re-adaptation. Here, the fixed effect of  
338 time was considered as a continuous variable; we were primarily interested in whether there  
339 was a significant effect of time across these post-flight session, to assess the post-flight  
340 recovery profile. As in model 1, mean centered age at launch, sex, and total flight duration as  
341 covariates.

342 Model 3) Direct effects of microgravity

343 This model only measured in-flight performance. We utilized time as a continuous  
344 variable to evaluate performance changes from pre-flight (L-60) to the first in-flight time point  
345 (FD30). Only the in-flight metrics (cube rotation, dual-tasking) were included in this analysis.  
346 Mean centered age and sex were included as covariates.

347 Model 4) Effects of duration aboard the ISS

348 This model only measured in-flight performance for the duration of the mission. We  
349 utilized time as a continuous variable to evaluate changes in performance across the three  
350 testing periods during spaceflight (FD30, FD90 and FD150). Mean centered age and sex were  
351 included as covariates. Since conditions for Cube 2 could only be replicated in spaceflight, we  
352 tested for a main effect (cube 1 vs cube 2) for this task.

353

354 **3. Results**

355 Tables 2-5 present all results from the statistical models. Bolded and underlined results  
 356 remained significant at  $FDR < 0.05$ . Italicized and underlined results were significant before FDR  
 357 correction, but did not remain significant following FDR correction.

358 1) The effect of the microgravity environment

359 We identified significant pre-flight to post-flight performance declines in all sensorimotor  
 360 tasks (Table 2). FMT completion time increased from pre- to post-flight ( $p=0.001$ , Fig. 2) as  
 361 astronauts were slower post-flight. We also identified significant pre-flight to post-flight balance  
 362 declines, reflected as Equilibrium Quotient scores decreased on both the SOT-5 ( $p=0.011$ , Fig.  
 363 3), and SOT-5M ( $p=0.003$ , Fig. 4). Astronauts also had a significant increase in completion time  
 364 on the bimanual Purdue Pegboard Test; that is they were slower to complete the task post-flight  
 365 ( $p=0.007$ , Fig. 5).

366 **Table 2:** Effects of the microgravity environment

|                   | Time    |                     | Age     |       | Sex     |       | Flight Duration |                     | Days Since Landing |       |
|-------------------|---------|---------------------|---------|-------|---------|-------|-----------------|---------------------|--------------------|-------|
| Sensorimotor Task | $\beta$ | $p$                 | $\beta$ | $p$   | $\beta$ | $p$   | $\beta$         | $p$                 | $\beta$            | $p$   |
| Pegboard Time (s) | 3.249   | <b><u>0.008</u></b> | 0.070   | 0.591 | 1.414   | 0.397 | 0.0323          | <b><u>0.031</u></b> | -0.146             | 0.861 |
| FMT Time (s)      | 6.282   | <b><u>0.001</u></b> | 0.006   | 0.981 | -4.807  | 0.145 | -0.008          | 0.751               | -1.088             | 0.383 |
| SOT-5 EQ Score    | -8.471  | <b><u>0.010</u></b> | 0.591   | 0.055 | 0.691   | 0.841 | -0.003          | 0.911               | 3.33               | 0.330 |
| SOT-5M EQ Score   | -30.565 | <b><u>0.001</u></b> | 0.673   | 0.362 | 17.640  | 0.064 | -0.065          | 0.383               | 0.292              | 0.973 |
| Cognitive Task    | $\beta$ | $p$                 | $\beta$ | $p$   | $\beta$ | $p$   | $\beta$         | $p$                 | $\beta$            | $p$   |
| DSST Time (s)     | 5.351   | 0.218               | 2.049   | 0.126 | -17.265 | 0.290 | 0.168           | 0.217               | -2.059             | 0.607 |

BEHAVIORAL EFFECTS OF SPACEFLIGHT

|               |                      |        |                     |        |       |        |       |        |       |        |                     |
|---------------|----------------------|--------|---------------------|--------|-------|--------|-------|--------|-------|--------|---------------------|
| Card rotation | Time (s)             | 7.254  | 0.110               | -0.966 | 0.357 | 1.559  | 0.903 | 0.084  | 0.434 | -3.204 | 0.425               |
|               | Correct (%)          | -0.804 | 0.512               | -0.317 | 0.280 | 6.868  | 0.074 | -0.017 | 0.565 | -1.082 | 0.345               |
|               | Compl. (%)           | -0.937 | 0.427               | -0.254 | 0.243 | 6.101  | 0.360 | -0.013 | 0.563 | -1.152 | 0.277               |
| RFT           | Variability          | 0.092  | 0.685               | 0.020  | 0.370 | -0.472 | 0.119 | 0.002  | 0.409 | -0.058 | 0.727               |
|               | Frame Effect         | 0.509  | 0.118               | 0.041  | 0.785 | -0.530 | 0.780 | -0.002 | 0.901 | -0.582 | 0.071               |
| Cube Rotation | Time (s)             | -0.673 | <b><u>0.004</u></b> | -0.023 | 0.449 | 0.347  | 0.361 | -0.001 | 0.778 | 0.0169 | 0.918               |
|               | Correct (#)          | 0.601  | 0.472               | -0.188 | 0.126 | 1.807  | 0.231 | 0.004  | 0.747 | 0.251  | 0.717               |
| DTC           | Tap Accuracy         | -0.957 | 0.717               | -0.310 | 0.395 | 1.273  | 0.779 | -0.032 | 0.392 | 1.290  | 0.448               |
|               | RT                   | -4.156 | 0.095               | 0.335  | 0.457 | -3.957 | 0.485 | -0.015 | 0.745 | -0.688 | 0.674               |
|               | Count                | 0.00   | 1.00                | 1.834  | 0.197 | 2.060  | 0.905 | -0.071 | 0.617 | -6.544 | 0.216               |
| SWM           | Rotation Correct (#) | 0.101  | 0.882               | 0.952  | 0.401 | -1.112 | 0.443 | -0.007 | 0.547 | -0.443 | 0.336               |
|               | Control Correct (#)  | -0.611 | 0.205               | -0.014 | 0.750 | 0.811  | 0.190 | -0.000 | 0.960 | -0.556 | <b><u>0.049</u></b> |

367 **Table 2 Note.** Results from the statistical model evaluating the pre- to post-flight effects of time, age, sex, flight  
368 duration and days since landing. Values that are bolded and underlined were significant and survived the Benjamini-  
369 Hochberg FDR correction. Values underlined and italicized were significant, but did not survive the correction.

370 DSST: digit symbol substitution test; RFT: rod and frame test; DTC: dual-task cost; RT: reaction time; SWM: spatial  
371 working memory; FMT: Functional Mobility Test; SOT-5: Sensory Organization Test 5; SOT-5M: Sensory  
372 Organization Test 5 with head movements; EQ Score: Equilibrium score

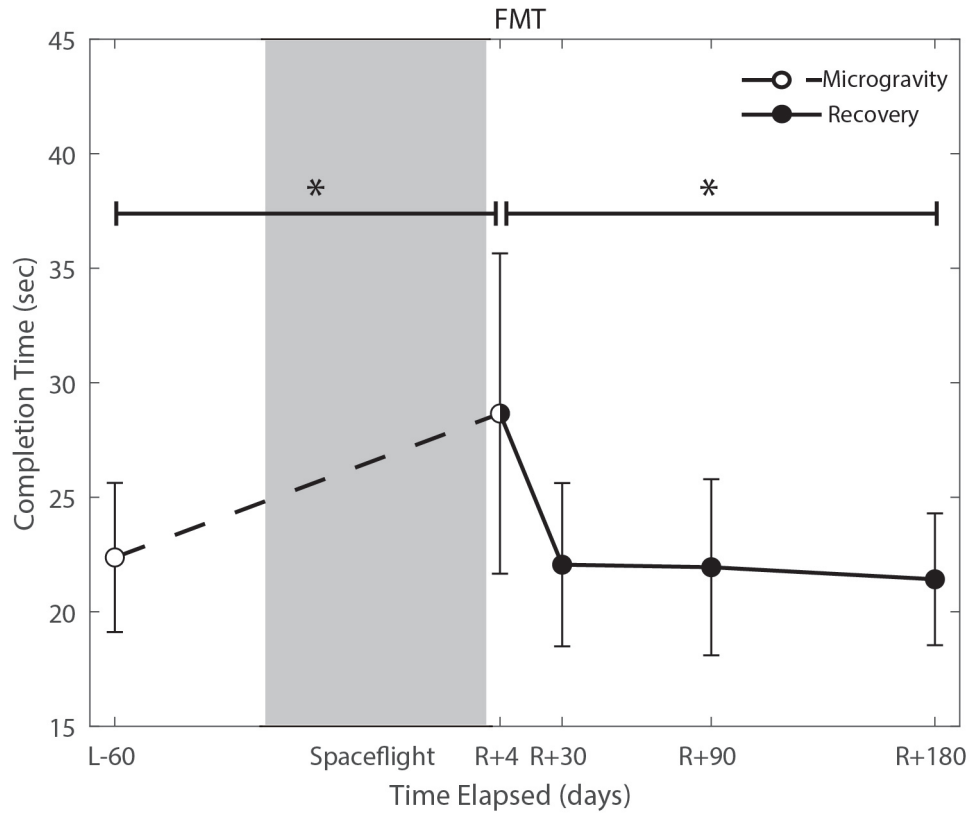

373

374 *Figure 2. Functional Mobility Test (FMT) performance changes from pre- to post-flight spaceflight and post-flight*  
375 *recovery. Spaceflight resulted in a significant decrease in completion time (seconds;  $p=0.001$ ). Completion time*  
376 *recovered to baseline levels by approximately 30 days post-flight ( $p=0.0001$ ).*

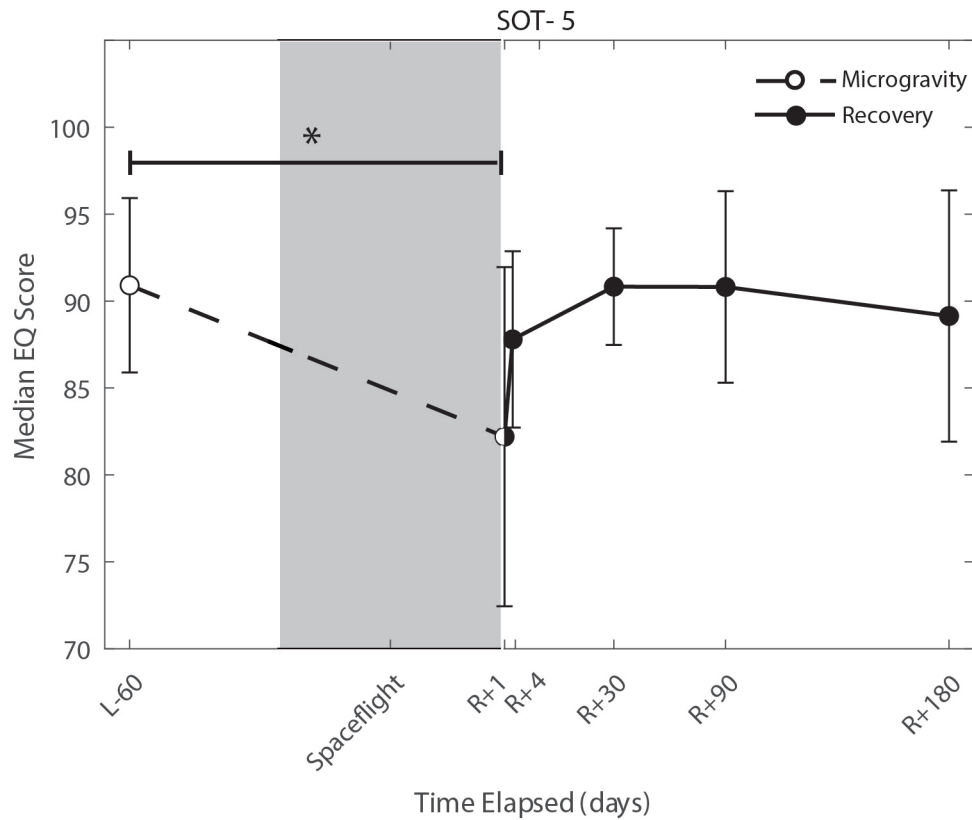

377

378 *Figure 3. Balance (SOT-5) changes from pre- to post-flight and post-flight recovery. The Sensory Organization Task 5*  
379 *(SOT-5) performance changes indicate an effect of the microgravity environment resulted in a significant decrease in*  
380 *Equilibrium Score ( $p=0.01$ ), that did not show statistically significant recovery.*

381

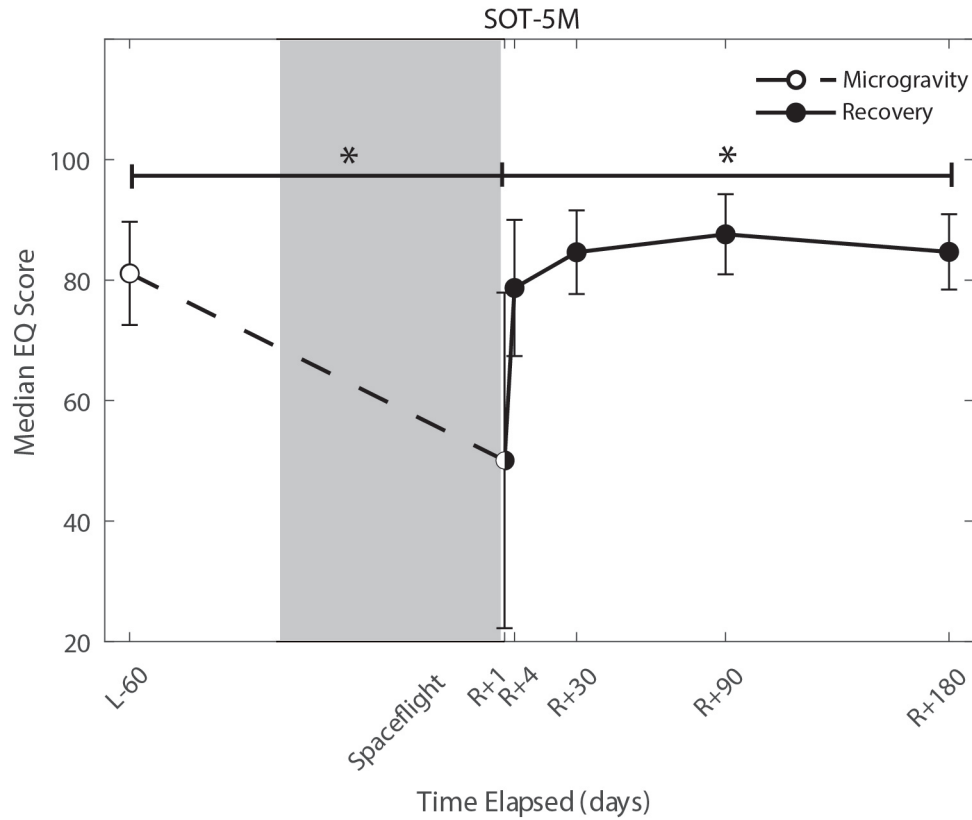

382

383 *Figure 4. Balance (SOT-5M) changes from pre- to post-flight and post-flight recovery. Sensory Organization Task 5*  
384 *with head movements (SOT-5M) performance changes indicate an effect of the microgravity environment resulted in*  
385 *a significant decrease in Equilibrium Score ( $p=0.001$ ). There was a significant recovery of performance following*  
386 *spaceflight ( $p=0.005$ ).*

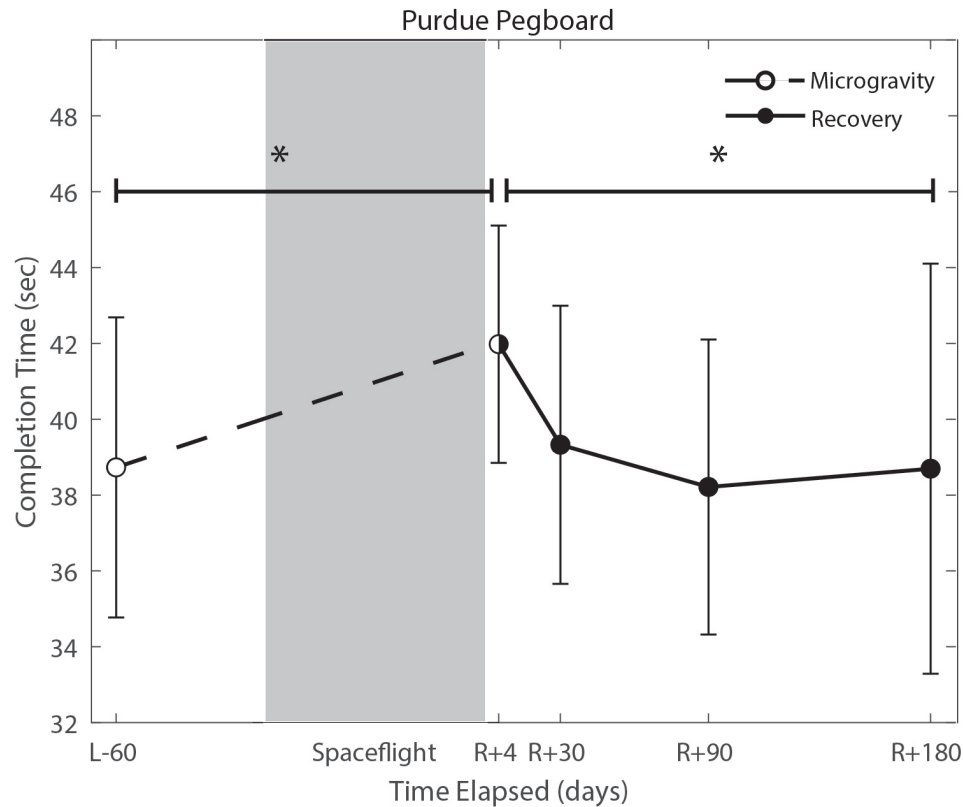

387

388 *Figure 5. Bimanual Purdue Pegboard completion time changes from pre- to post-flight and post-flight recovery. There*  
389 *is a significant increase in completion time ( $p=0.008$ ) pre- to post-flight. There is a significant change in recovery*  
390 *( $p=0.016$ ).*

391 With the exception of cube rotation, no cognitive assessments showed pre-flight to post-  
392 flight changes. Cube rotation response time decreased significantly post-flight ( $p=0.004$ ; Fig. 6);  
393 as astronauts showed faster cube rotation completion time post-flight. We also identified a  
394 significant effect of days since landing on the SWM control task ( $p=0.049$ ); where a longer time  
395 delay between landing and the first session was associated with better SWM control task  
396 performance.

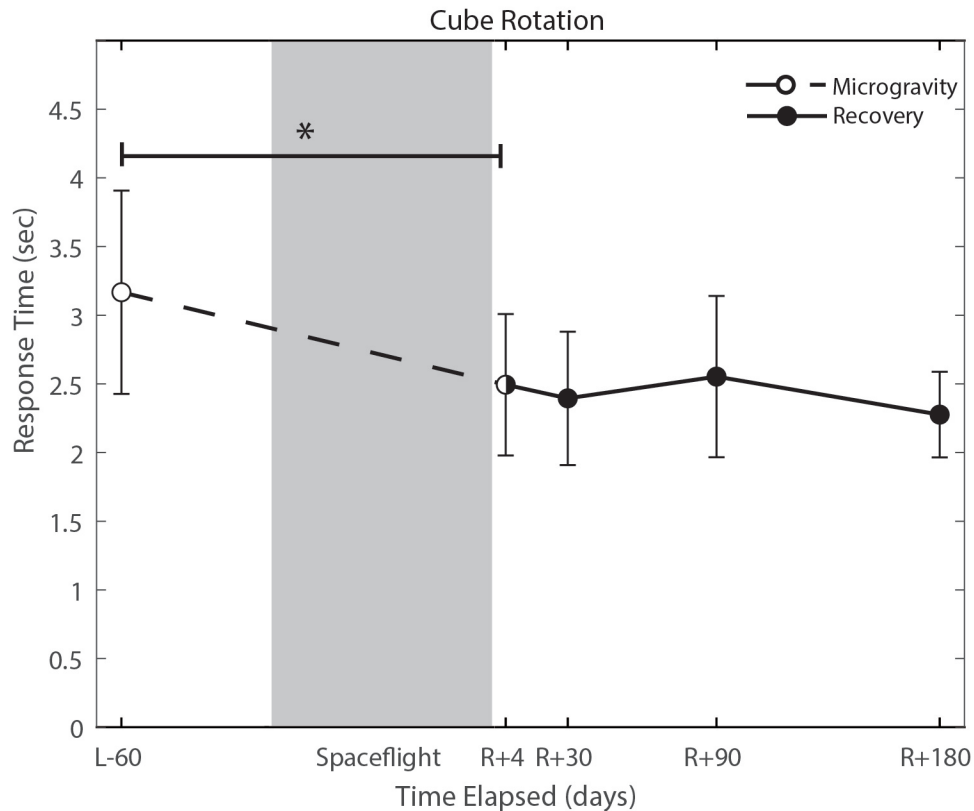

397

398 *Figure 6. Cube rotation performance changes from pre- to post-flight and post-flight recovery. Subject's response*  
399 *time improved ( $p=0.004$ ) as a significant decrease in response time.*

## 400 2) Recovery from the microgravity environment

401 Of the measures that changed significantly from pre-flight to post-flight, we observed  
402 significant post-flight recovery (Table 3) on the bimanual Purdue Pegboard Test ( $p=0.0158$ ),  
403 FMT ( $p=0.0001$ ) and the SOT-5M ( $p=0.0062$ ). Astronauts' performance on the bimanual Purdue  
404 Pegboard Test returned to near baseline levels by 30 days post-flight and continued to improve  
405 by 90 days post-flight (Fig. 5). FMT performance showed similar trends, with a return to pre-  
406 flight performance levels by R+30 (Fig. 2). SOT-5M scores showed substantial improvements in  
407 performance from R+1 to R+4 that continued to improve at R+30 and R+90 before plateauing  
408 (Fig. 4).

## 409 3) **Table 3:** Recovery from the microgravity environment



|                   |          | Days Since Return |                      | Age     |       | Sex     |       | Flight Duration |       |
|-------------------|----------|-------------------|----------------------|---------|-------|---------|-------|-----------------|-------|
| Sensorimotor Task |          | $\beta$           | $p$                  | $\beta$ | $p$   | $\beta$ | $p$   | $\beta$         | $p$   |
| Pegboard          | Time (s) | -0.136            | <b><u>0.016</u></b>  | 0.176   | 0.274 | 0.748   | 0.716 | 0.020           | 0.248 |
| FMT               | Time (s) | -0.030            | <b><u>0.0001</u></b> | 0.031   | 0.877 | -4.196  | 0.121 | 0.007           | 0.753 |
| SOT-5             | EQ Score | 0.019             | 0.063                | 0.419   | 0.055 | 1.505   | 0.584 | -0.007          | 0.748 |
| SOT-5M            | EQ Score | 0.106             | <b><u>0.005</u></b>  | 0.560   | 0.177 | 9.853   | 0.078 | -0.006          | 0.884 |
| Cognitive Task    |          | $\beta$           | $p$                  | $\beta$ | $p$   | $\beta$ | $p$   | $\beta$         | $p$   |
| Cube Rotation     | Time (s) | -0.001            | 0.331                | -0.024  | 0.319 | 0.489   | 0.125 | 0.001           | 0.672 |

410 **Table 3 Note.** Results from the statistical model evaluating the recovery from spaceflight effects of days returned,  
 411 age, sex and flight duration. Values that are bolded and underlined were significant and survived the Benjamini-  
 412 Hochberg FDR correction. Values underlined and italicized were significant, but did not survive the correction.

413 FMT: Functional Mobility Test; SOT-5: Sensory Organization Test 5; SOT-5M: Sensory Organization Test 5 with head  
 414 movements; EQ Score: Equilibrium score

415 4) Direct effects of microgravity

416 Astronauts performed two cognitive tasks (cube rotation and dual-tasking) aboard the  
 417 ISS, first approximately 30 days after their arrival. There was no significant pre- to in-flight  
 418 performance changes on these tasks (Table 4).

419 **Table 4: Direct effects of the microgravity environment**

|      |         | Days Since Launch |     | Age     |     | Sex     |     |
|------|---------|-------------------|-----|---------|-----|---------|-----|
| Task | Measure | $\beta$           | $p$ | $\beta$ | $p$ | $\beta$ | $p$ |

|     |       |        |       |        |       |        |       |
|-----|-------|--------|-------|--------|-------|--------|-------|
| DTC | Tap   | -0.035 | 0.828 | -0.548 | 0.149 | 5.333  | 0.291 |
|     | RT    | -0.071 | 0.744 | 0.531  | 0.400 | -2.268 | 0.789 |
|     | Count | 0.320  | 0.580 | 1.620  | 0.136 | 9.600  | 0.500 |

420 **Table 4 Note.** Here we present the results from the statistical models testing for performance changes from pre- to  
 421 in-flight, controlling for age at launch and sex. In this case, no models yielded statistically significant results.

422 Abbreviations: DTC: dual task cost; RT: reaction time

423

424 5) Effects of duration on the ISS

425 There were no significant changes in performance of the cube rotation or dual-tasking  
 426 assessments across the three in-flight time points (Table 5).

427 **Table 5: Effects of duration aboard the ISS**

|                    |             | Time Aboard ISS |       | Age           |              | Sex     |       |     |
|--------------------|-------------|-----------------|-------|---------------|--------------|---------|-------|-----|
| Task               | Measure     | $\beta$         | $p$   | $\beta$       | $p$          | $\beta$ | $p$   |     |
| Cube 1             | Time (s)    | -0.001          | 0.528 | -0.010        | 0.688        | 0.479   | 0.192 |     |
|                    | Correct (%) | 0.004           | 0.638 | -0.155        | 0.118        | 1.958   | 0.161 |     |
| Cube 2             | Time (s)    | -0.001          | 0.520 | -0.011        | 0.707        | 0.462   | 0.245 |     |
|                    | Correct (%) | 0.008           | 0.326 | -0.138        | 0.130        | 1.396   | 0.271 |     |
| DTC                | Tap         | 0.012           | 0.540 | -0.201        | 0.434        | 1.102   | 0.758 |     |
|                    | RT          | 0.007           | 0.861 | 0.916         | 0.059        | -6.588  | 0.322 |     |
|                    | Count       | -0.056          | 0.193 | 0.890         | <u>0.033</u> | -8.426  | 0.148 |     |
| Duration of Flight |             | Main Effect     |       | Days Inflight |              | Age     |       | Sex |

| Task            | Measure      | $\beta$ | $p$   | $\beta$ | $p$   | $\beta$ | $p$   | $\beta$ | $p$   |
|-----------------|--------------|---------|-------|---------|-------|---------|-------|---------|-------|
| Cube Comparison | Time (s)     | -0.141  | 0.093 | -0.001  | 0.318 | -0.010  | 0.686 | 0.470   | 0.203 |
|                 | Accuracy (%) | 0.311   | 0.521 | 0.006   | 0.310 | -0.147  | 0.098 | 1.677   | 0.185 |

428 **Table 5 Note.** Here we present the results from the statistical model testing for performance changes in cube rotation  
429 and dual task across flight (i.e., “days inflight”), controlling for age at launch and sex. Cube 1: Astronauts performed  
430 this task while free floating and tethered to their workstation. Cube 2: astronauts performed this task while tethered to  
431 their workstation, but with their feet looped into the “floor”.

432 Abbreviations: DTC: dual task cost; RT: reaction time

433

## 434 4. Discussion

435 The current study was designed to investigate sensorimotor and cognitive performance  
436 changes associated with long-duration spaceflight and their subsequent recovery post-flight.  
437 Consistent with previous results (Reschke et al., 1994a; 1994b; 1998; McDonald et al. 1996,  
438 Bloomberg et al. 1997; Layne et al. 1998; Mulavara et al., 2010; Mulavara et al., 2018; Miller et  
439 al., 2018), we found pre- to post-flight declines in balance and mobility. There were also  
440 declines in bimanual coordination from pre- to post-flight, as indicated by performance on the  
441 bimanual Purdue Pegboard Test. All of these measures were shown to recover by 30 days after  
442 return to Earth. There were no significant effects of spaceflight on the cognitive measures  
443 collected here, including pre- to post-flight and pre- to in-flight performance comparisons.

### 444 4.1. Whole-body postural and locomotor control

445 Sensorimotor deficits due to spaceflight have been previously reported following both  
446 short (weeks) and long (months) duration spaceflight (Reschke et al., 1994a; 1994b; 1995;

447 1998; McDonald et al. 1996, Bloomberg et al. 1997; Layne et al. 1998; Mulavara et al., 2010;  
448 Mulavara et al., 2018; Miller et al., 2018); here, we find similar declines and subsequent  
449 recovery profiles in locomotion and balance. These balance and gait findings support the  
450 argument that adaptive sensory reweighting occurs during spaceflight. While in the microgravity  
451 environment of space, the vestibular system is limited to receive acceleration inputs from the  
452 otoliths. The central nervous system adapts by upweighting other sensory inputs (e.g. visual  
453 and proprioceptive inputs). Upon return to Earth, vestibular afferent inputs return to normal  
454 levels and in-flight adaptations become maladaptive. As evident in Figures 3 and 4, SOT-5 and  
455 SOT-5M performance show significant deficits at R+1; however, by R+4 postural control has  
456 returned to near baseline levels. There appear to be some slow, persisting effects out to R+30,  
457 suggesting both rapid and slower re-adaptation processes. Adaptation of reaching movements  
458 to visuomotor conflict (e.g., visuomotor rotation where visual feedback is offset as a  
459 perturbation) on Earth has been well-studied. This literature suggests that early adaptive  
460 changes are more cognitive and strategic in nature whereas slower changes reflect more  
461 implicit, procedural processes (Anguera et al., 2010; Taylor & Ivry, 2013; McDougle et al., 2015;  
462 Christou et al. 2016). It is unclear whether similar processes are at work when adapting to  
463 sensory conflict on Earth and adapting to the sensory conflict created by microgravity, but the  
464 initial fast recovery followed by a slower timeline to reach pre-flight levels suggests the  
465 possibility of similar processes.

#### 466 4.2. Fine motor control

467 Novel findings here include a significant increase in bimanual Purdue Pegboard Test  
468 completion time. We fit a linear regression model between age and bimanual Purdue Pegboard  
469 completion time in a control sample of 24 subjects (mean age 33.292, 8 female), and found that  
470 completion time increased by 0.13 seconds per year of age. The reported increase of 3.25  
471 seconds exhibited by crewmembers is approximately equivalent to a 25 year age difference.

472 However, it should be noted that the controls were, on average, 14 years younger than  
473 astronaut crewmembers, which may result in overestimation of years decline pre to postflight.  
474 Previous reports of fine motor control declines following spaceflight include impairments in force  
475 modulation (Rafiq et al., 2006), surgical operating completion time (Campbell et al., 2005),  
476 keyed pegboard completion time (Mulavara et al., 2018), decreased unimanual Purdue  
477 Pegboard performance (Moore et al., 2019), reaction time, movement duration, and response  
478 amplitude (Bock et al., 2003). These findings have raised concerns that astronauts will face  
479 increased risk of operational task failure (Paloski et al., 2008). The results from the current study  
480 further support previous findings that there is a marked impairment in fine motor control due to  
481 spaceflight, including bimanual coordination. Moreover, these changes are evident up until 30  
482 days post-flight. While the mechanisms underlying these manual motor control declines are  
483 unclear, it has been shown that there is an increase in skin sensitivity for both fast and slow  
484 receptors following spaceflight (Lowrey et al., 2014). This upweighting of tactile inputs may be  
485 adaptive in flight when the body is unloaded, but could potentially be maladaptive upon return to  
486 Earth, resulting in these transient manual motor performance declines.

#### 487 4.3. Cognitive measures

488 Cognitive declines with spaceflight have not conclusively been observed. Changes that have  
489 been reported include an increased ability to mentally rotate their environment, and decreased  
490 ability to spatially orient letters in a word during early short duration spaceflight (Clément et al.,  
491 1987), reduced cognitive-motor dual-tasking ability (Manzey et al., 1995; 1998; Bock et al., 2010),  
492 increases in risky behavior in a single subject case study (Garrett-Bakelman et al., 2019), and  
493 anecdotal reports of “space fog” (Clément et al., 2020). In the present study, we investigated a  
494 range of cognitive domains both from pre- to post-flight and while astronauts were aboard the  
495 ISS. The only significant changes from pre- to post-flight that survived FDR correction was in the  
496 cube rotation response time, which showed a decrease in response time that is likely attributable

497 to a practice effect. Astronauts performed the cube rotation task twice per test session aboard the  
498 ISS, once while free floating yet tethered to the laptop console and again while tethered with feet  
499 in loops on the “floor”. These two setups allowed us to identify whether somatosensory feedback  
500 associated with having the feet on the “floor” and performing the task in a “seated” posture  
501 provides spatial orientation cues to aid in mental rotation performance. There were no statistically  
502 significant differences ( $p=0.093$ ) between cube 1 (feet unattached) and cube 2 (feet attached),  
503 however there were trend level effects of a faster response time on cube 2. These results may be  
504 limited by our small sample size, but could potentially have operational relevance. This trend level  
505 effect could reflect practice.

#### 506 4.4. Mission duration

507 A current focus in spaceflight research is understanding the effects of flight duration on the  
508 human brain and behavior. NASA is planning to return to the Moon with the Artemis program  
509 and Mars by the 2030's. A round trip to Mars is estimated to be around 21 months, which is  
510 longer than any current astronaut has spent in space on any given mission. This makes it  
511 imperative to understand whether there is a “dose-dependent” effect of spaceflight  
512 stressors/hazards on human performance. In the current study, most astronauts had mission  
513 durations of approximately 6 months, but there was a range with some crewmembers spending  
514 nearly 12 months (ranging from 4 to 11 months in space). We included mission duration in our  
515 statistical models to investigate its effect, finding only an uncorrected decline in bimanual  
516 Purdue Pegboard Test completion time with longer flight duration. The lack of spaceflight  
517 duration effects on our results may suggest that there are little functional changes associated  
518 with mission duration; however, it has been shown recently that the magnitude of spaceflight-  
519 associated structural brain changes is directly related to mission duration. We (Hupfeld et al.  
520 2020a) recently reported that astronauts who spent one year in space exhibited larger  
521 magnitude brain fluid shifts, greater right precentral gyrus gray matter volume and cortical

522 thickness changes, greater supplementary motor area gray matter volume changes, and greater  
523 free water volume changes within the frontal pole. Six-month missions were shown to result in  
524 greater increases in cerebellar volume as compared to 12-month missions. Brain changes  
525 exhibited only partial recovery at six months post-flight (Hupfeld et al. 2020a). Our work and  
526 other studies have also reported that there are persisting ventricular volume changes at six  
527 months and one year post-flight (Hupfeld et al. 2020a; Van Ombergen et al., 2019; Kramer et  
528 al., 2020; Jillings et al., 2020). It is important to consider these brain changes; it is possible that  
529 behavior has returned to pre-flight levels by one month post-flight without a concomitant return  
530 to pre-flight neural control patterns. That is, there may be a substitution of brain networks or  
531 compensation that is still taking place post-flight even when behavior has recovered, without  
532 restitution of pre-flight brain (Rothi et al. 1983, Hupfeld et al., 2020b).

533         This study is one of the few to have collected longitudinal data from astronauts on the  
534 ISS, allowing us to directly examine the effects of initial and longer term microgravity exposure.  
535 One of the tasks measured during spaceflight required single and dual-tasking. Dual- tasking  
536 has been evaluated previously during spaceflight; results showed impairments in both cognitive  
537 and motor behaviors in long duration spaceflight missions (Manzey et al. 1995; 1998), with dual-  
538 task costs greater in space than on Earth. Additionally, these impairments were greatest during  
539 early flight and stabilized after approximately 9 months in space. However, these two reports  
540 were single subject case studies. Bock et al. (2010) further investigated dual-tasking in  
541 microgravity with a larger cohort of 3 astronauts performing a tracking task while also  
542 performing one of four reaction time tasks. They found an overall increase in tracking error and  
543 reaction time under dual-task conditions. The present results differ as we found no differences  
544 in dual-task costs upon arrival to the ISS (performance measured at approximately 30 days into  
545 the flight and compared to pre-flight), nor as flight duration increased (performance measured at  
546 approximately 90 and 180 days into the flight). This may be due to a difference in complexity of

547 the cognitive and motor tasks, a difference in the underlying task mechanisms, or due to the  
548 larger sample evaluated here.

549 4.5. Limitations

550 One of the primary limitations of this study is the small number of female astronauts; of  
551 the fifteen participants, only three were female. This does not allow sufficient power to evaluate  
552 sex differences. Another limitation in this study is the time delay between landing and the initial  
553 post-flight data collection, as astronauts re-adapt to Earth's gravity relatively quickly. We found  
554 that postural control returned to baseline levels within roughly four days post-flight. It is possible  
555 that some of our other measures respond in a similar manner; this would mean that, by post-  
556 flight day four, we may have missed many spaceflight-related performance changes. Moreover,  
557 we did not have test sessions between post-flight days 4 and 30, limiting our ability to delineate  
558 post-flight rapid recovery curves.

559 In this study, we evaluated the effects of the microgravity environment on astronauts'  
560 sensorimotor and cognitive performance with a range of behavioral measures collected before,  
561 during, and following missions to the ISS. We found marked decreases in balance, mobility and  
562 bimanual coordination following exposure to the microgravity environment. These declines are  
563 transient and return to baseline levels within roughly 30 days. Additionally, we identified a trend  
564 for increased cognitive performance on some measures when astronauts had their feet on the  
565 "floor" of the ISS, suggesting that additional orientation cues may increase spatial working  
566 memory ability in microgravity. In the same sample, we also collected functional MRI data  
567 during task performance before and following spaceflight as well as measures of brain structure  
568 (structural MRI and diffusion weighted MRI). In future analyses, we will examine brain changes  
569 and their relation to behavioral performance. It may be that, in cases where we do not see  
570 behavioral changes, the underlying networks engaged for task performance will have changed



571 in a compensatory fashion due to spaceflight. Further analyses of our neuroimaging data in  
572 conjunction with these performance measures will give us insight into the adaptive or  
573 maladaptive effects of spaceflight.

574

575

576

577

578

579

580

581

582

583

584

## 585 Acknowledgements

586 This work was supported by grants from the National Aeronautics and Space Administration  
587 (NASA NNX11AR02G to R.S., A.M., S.W., P.A.R.L. and J.B. During the completion of this work  
588 G.T. was supported by the University of Florida's (UF) Graduate Student Funding Award. K.H.  
589 was supported by a National Science Foundation Graduate Research Fellowship under Grant  
590 no. DGE-1315138 and DGE-1842473, National Institute of Neurological Disorders and Stroke  
591 training grant T32-NS082128, and National Institute on Aging fellowship 1F99AG068440. H.M.  
592 was supported by a Natural Sciences and Engineering Research Council of Canada (NSERC)  
593 Postdoctoral Fellowship and a NASA Human Research Program Augmentation Grant. The  
594 authors would like to thank all of the astronauts who volunteered their time, without them this  
595 project would not have been possible.

596

597

598

599

600

601

## 602 References

- 603 Alperin, N., Bagci, A. M., & Lee, S. H. (2017). Spaceflight-induced changes in white matter  
604 hyperintensity burden in astronauts. *Neurology*, *89*(21), 2187–2191.
- 605 Anguera, J. A., Reuter-Lorenz, P. A., Willingham, D. T., & Seidler, R. D. (2010). Contributions of  
606 spatial working memory to visuomotor learning. *Journal of Cognitive Neuroscience*, *22*(9),  
607 1917–1930.
- 608 Anguera, J. A., Reuter-Lorenz, P. A., Willingham, D. T., & Seidler, R. D. (2011). Failure to  
609 engage spatial working memory contributes to age-related declines in visuomotor learning.  
610 *Journal of Cognitive Neuroscience*, *23*(1), 11–25.
- 611 Basner, M., Stahn, A. C., Nasrini, J., Dinges, D. F., Moore, T. M., Gur, R. C., Mühl, C., Macias,  
612 B. R., & Laurie, S. S. (2021). Effects of Head-Down Tilt Bed Rest Plus Elevated CO<sub>2</sub> on  
613 Cognitive Performance. *Journal of Applied Physiology*.  
614 <https://doi.org/10.1152/jappphysiol.00865.2020>
- 615 Benjamini, Y., & Hochberg, Y. (1995). Controlling the False Discovery Rate: A Practical and  
616 Powerful Approach to Multiple Testing. *Journal of the Royal Statistical Society. Series B,*  
617 *Statistical Methodology*, *57*(1), 289–300.
- 618 Black, F. O., Paloski, W. H., Doxey-Gasway, D. D., & Reschke, M. F. (1995). Vestibular  
619 plasticity following orbital spaceflight: recovery from postflight postural instability. *Acta Oto-*  
620 *Laryngologica. Supplementum*, *520 Pt 2*, 450–454.
- 621 Black, F. O., Paloski, W. H., Reschke, M. F., Igarashi, M., Guedry, F., & Anderson, D. J. (1999).  
622 Disruption of postural readaptation by inertial stimuli following space flight. *Journal of*  
623 *Vestibular Research: Equilibrium & Orientation*, *9*(5), 369–378.
- 624 Bloomberg, J. J., Peters, B. T., Cohen, H. S., & Mulavara, A. P. (2015). Enhancing astronaut  
625 performance using sensorimotor adaptability training. *Frontiers in Systems Neuroscience*,  
626 *9*, 129.

- 627 Bloomberg, J. J., Peters, B. T., Smith, S. L., Huebner, W. P., & Reschke, M. F. (1997).  
628 Locomotor head-trunk coordination strategies following space flight. *Journal of Vestibular*  
629 *Research: Equilibrium & Orientation*, 7(2-3), 161–177.
- 630 Bock, O., Abeele, S., & Eversheim, U. (2003). Sensorimotor performance and computational  
631 demand during short-term exposure to microgravity. *Aviation, Space, and Environmental*  
632 *Medicine*, 74(12), 1256–1262.
- 633 Bock, O., Weigelt, C., & Bloomberg, J. J. (2010). Cognitive demand of human sensorimotor  
634 performance during an extended space mission: a dual-task study. *Aviation, Space, and*  
635 *Environmental Medicine*, 81(9), 819–824.
- 636 Bryanov, I. I., Yemel'yanov, M. D., Matveyev, A. D., Mantsev, E. I., Tarasov, I. K., Yakovleva, I.  
637 K., Kakurin, L. I., Kozerenko, O. P., Myasnikov, V. I., Yeremin, A. V., & Others. (1976).  
638 Space flights in the Soyuz spacecraft: biomedical research. *Redwood City, CA: Kanner*  
639 *Associates*.
- 640 Campbell, M. R., Williams, D. R., Buckey, J. C., Jr, & Kirkpatrick, A. W. (2005). Animal surgery  
641 during spaceflight on the Neurolab Shuttle mission. *Aviation, Space, and Environmental*  
642 *Medicine*, 76(6), 589–593.
- 643 Christou, A. I., Miall, R. C., McNab, F., & Galea, J. M. (2016). Individual differences in explicit  
644 and implicit visuomotor learning and working memory capacity. *Scientific Reports*, 6,  
645 36633.
- 646 Clement, G., Berthoz, A., & Lestienne, F. (1987). Adaptive changes in perception of body  
647 orientation and mental image rotation in microgravity. *Aviation, Space, and Environmental*  
648 *Medicine*, 58(9 Pt 2), A159–A163.
- 649 Clément, G., Loureiro, N., Sousa, D., & Zandvliet, A. (2016). Perception of Egocentric Distance  
650 during Gravitational Changes in Parabolic Flight. *PLoS One*, 11(7), e0159422.
- 651 Clément, G. R., Boyle, R. D., George, K. A., Nelson, G. A., Reschke, M. F., Williams, T. J., &  
652 Paloski, W. H. (2020). Challenges to the central nervous system during human spaceflight

- 653 missions to Mars. *Journal of Neurophysiology*, 123(5), 2037–2063.
- 654 Ekstrom, R. B., & Harman, H. H. (1976). *Manual for kit of factor-referenced cognitive tests*,  
655 1976. Educational testing service.
- 656 Garrett-Bakelman, F. E., Darshi, M., Green, S. J., Gur, R. C., Lin, L., Macias, B. R., McKenna,  
657 M. J., Meydan, C., Mishra, T., Nasrini, J., Piening, B. D., Rizzardi, L. F., Sharma, K.,  
658 Siamwala, J. H., Taylor, L., Vitaterna, M. H., Afkarian, M., Afshinnekoo, E., Ahadi, S., ...  
659 Turek, F. W. (2019). The NASA Twins Study: A multidimensional analysis of a year-long  
660 human spaceflight. *Science*, 364(6436). <https://doi.org/10.1126/science.aau8650>
- 661 Hupfeld, K. E., McGregor, H. R., Lee, J. K., Beltran, N. E., Kofman, I. S., De Dios, Y. E., Reuter-  
662 Lorenz, P. A., Riascos, R. F., Pasternak, O., Wood, S. J., Bloomberg, J. J., Mulavara, A.  
663 P., Seidler, R. D., & Alzheimer's Disease Neuroimaging Initiative. (2020). The Impact of 6  
664 and 12 Months in Space on Human Brain Structure and Intracranial Fluid Shifts. *Cerebral*  
665 *Cortex Communications*, 1(1), tgaa023.
- 666 Hupfeld, K., McGregor, H., Reuter-Lorenz, P., & Seidler, R. (2020). *Microgravity Effects on the*  
667 *Human Brain and Behavior: Dysfunction and Adaptive Plasticity*.  
668 <https://doi.org/10.31234/osf.io/wx857>
- 669 Jillings, S., Van Ombergen, A., Tomilovskaya, E., Rumshiskaya, A., Litvinova, L., Nosikova, I.,  
670 Pechenkova, E., Rukavishnikov, I., Kozlovskaya, I. B., Manko, O., Danilichev, S., Sunaert,  
671 S., Parizel, P. M., Sinitsyn, V., Petrovichev, V., Laureys, S., Zu Eulenburg, P., Sijbers, J.,  
672 Wuyts, F. L., & Jeurissen, B. (2020). Macro- and microstructural changes in cosmonauts'  
673 brains after long-duration spaceflight. *Science Advances*, 6(36).  
674 <https://doi.org/10.1126/sciadv.aaz9488>
- 675 Koppelmans, V., Bloomberg, J. J., De Dios, Y. E., Wood, S. J., Reuter-Lorenz, P. A., Kofman, I.  
676 S., Riascos, R., Mulavara, A. P., & Seidler, R. D. (2017). Brain plasticity and sensorimotor  
677 deterioration as a function of 70 days head down tilt bed rest. *PloS One*, 12(8), e0182236.
- 678 Koppelmans, V., Erdeniz, B., De Dios, Y. E., Wood, S. J., Reuter-Lorenz, P. A., Kofman, I.,

- 679 Bloomberg, J. J., Mulavara, A. P., & Seidler, R. D. (2013). Study protocol to examine the  
680 effects of spaceflight and a spaceflight analog on neurocognitive performance: extent,  
681 longevity, and neural bases. In *BMC Neurology* (Vol. 13, Issue 1).  
682 <https://doi.org/10.1186/1471-2377-13-205>
- 683 Kramer, A., Venegas-Carro, M., Mulder, E., Lee, J. K., Moreno-Villanueva, M., Bürkle, A., &  
684 Gruber, M. (2020). Cardiorespiratory and Neuromuscular Demand of Daily Centrifugation:  
685 Results From the 60-Day AGBRESA Bed Rest Study. *Frontiers in Physiology*, *11*, 562377.
- 686 Layne, C. S., Lange, G. W., Pruett, C. J., McDonald, P. V., Merkle, L. A., Mulavara, A. P., Smith,  
687 S. L., Kozlovskaya, I. B., & Bloomberg, J. J. (1998). Adaptation of neuromuscular activation  
688 patterns during treadmill walking after long-duration space flight. *Acta Astronautica*, *43*(3-  
689 6), 107–119.
- 690 Layne, C. S., McDonald, P. V., & Bloomberg, J. J. (1997). Neuromuscular activation patterns  
691 during treadmill walking after space flight. *Experimental Brain Research. Experimentelle*  
692 *Hirnforschung. Experimentation Cerebrale*, *113*(1), 104–116.
- 693 Lee, J. K., De Dios, Y., Kofman, I., Mulavara, A. P., Bloomberg, J. J., & Seidler, R. D. (2019).  
694 Head Down Tilt Bed Rest Plus Elevated CO<sub>2</sub> as a Spaceflight Analog: Effects on Cognitive  
695 and Sensorimotor Performance. *Frontiers in Human Neuroscience*, *13*, 355.
- 696 Lowrey, C. R., Perry, S. D., Strzalkowski, N. D. J., Williams, D. R., Wood, S. J., & Bent, L. R.  
697 (2014). Selective skin sensitivity changes and sensory reweighting following short-duration  
698 space flight. *Journal of Applied Physiology*, *116*(6), 683–692.
- 699 Manzey, D., & Lorenz, B. (1998). Mental performance during short-term and long-term  
700 spaceflight. *Brain Research. Brain Research Reviews*, *28*(1-2), 215–221.
- 701 Manzey, D., Lorenz, B., Schiewe, A., Finell, G., & Thiele, G. (1995). Dual-task performance in  
702 space: results from a single-case study during a short-term space mission. *Human Factors*,  
703 *37*(4), 667–681.
- 704 McDonald, P. V., Basdogan, C., Bloomberg, J. J., & Layne, C. S. (1996). Lower limb kinematics

- 705 during treadmill walking after space flight: implications for gaze stabilization. *Experimental*  
706 *Brain Research. Experimentelle Hirnforschung. Experimentation Cerebrale*, 112(2), 325–  
707 334.
- 708 McDougle, S. D., Bond, K. M., & Taylor, J. A. (2015). Explicit and Implicit Processes Constitute  
709 the Fast and Slow Processes of Sensorimotor Learning. *The Journal of Neuroscience: The*  
710 *Official Journal of the Society for Neuroscience*, 35(26), 9568–9579.
- 711 Miller, C. A., Kofman, I. S., Brady, R. R., May-Phillips, T. R., Batson, C. D., Lawrence, E. L.,  
712 Taylor, L. C., Peters, B. T., Mulavara, A. P., Feiveson, A. H., Reschke, M. F., & Bloomberg,  
713 J. J. (2018). Functional Task and Balance Performance in Bed Rest Subjects and  
714 Astronauts. *Aerospace Medicine and Human Performance*, 89(9), 805–815.
- 715 Moore, S. T., Dilda, V., Morris, T. R., Yungheer, D. A., MacDougall, H. G., & Wood, S. J. (2019).  
716 Long-duration spaceflight adversely affects post-landing operator proficiency. *Scientific*  
717 *Reports*, 9(1), 1–14.
- 718 Mulavara, A. P., Feiveson, A. H., Fiedler, J., Cohen, H., Peters, B. T., Miller, C., Brady, R., &  
719 Bloomberg, J. J. (2010). Locomotor function after long-duration space flight: effects and  
720 motor learning during recovery. *Experimental Brain Research. Experimentelle*  
721 *Hirnforschung. Experimentation Cerebrale*, 202(3), 649–659.
- 722 Mulavara, A. P., Peters, B. T., Miller, C. A., Kofman, I. S., Reschke, M. F., Taylor, L. C.,  
723 Lawrence, E. L., Wood, S. J., Laurie, S. S., Lee, S. M. C., Buxton, R. E., May-Phillips, T.  
724 R., Stenger, M. B., Ploutz-Snyder, L. L., Ryder, J. W., Feiveson, A. H., & Bloomberg, J. J.  
725 (2018). Physiological and Functional Alterations after Spaceflight and Bed Rest. *Medicine*  
726 *and Science in Sports and Exercise*, 50(9), 1961–1980.
- 727 Nashner, L. M. (1972). Vestibular postural control model. *Kybernetik*, 10(2), 106–110.
- 728 Newman, D. J., Jackson, D. K., & Bloomberg, J. J. (1997). Altered astronaut lower limb and  
729 mass center kinematics in downward jumping following space flight. *Experimental Brain*  
730 *Research. Experimentelle Hirnforschung. Experimentation Cerebrale*, 117(1), 30–42.

- 731 Ozdemir, R. A., Goel, R., Reschke, M. F., Wood, S. J., & Paloski, W. H. (2018). Critical role of  
732 somatosensation in postural control following spaceflight: Vestibularly deficient astronauts  
733 are not able to maintain upright stance during compromised somatosensation. *Frontiers in*  
734 *Physiology*, 9, 1680.
- 735 Paloski, W. H., Bloomberg, J. J., Reschke, M. F., & Harm, D. L. (1994). Spaceflight-induced  
736 changes in posture and locomotion. In *Journal of Biomechanics* (Vol. 27, Issue 6, p. 812).  
737 [https://doi.org/10.1016/0021-9290\(94\)91366-8](https://doi.org/10.1016/0021-9290(94)91366-8)
- 738 Paloski, W. H., & Oman, C. M. (2008). Risk of sensory-motor performance failures affecting  
739 vehicle control during space missions: a review of the evidence. *Journal of*  
740 <http://humanresearchroadmap.nasa.gov/evidence/reports/Sensorimotor.pdf>
- 741 Paloski, W. H., Reschke, M. F., Black, F. O., Doxey, D. D., & Harm, D. L. (1992). Recovery of  
742 postural equilibrium control following spaceflight. *Annals of the New York Academy of*  
743 *Sciences*, 656, 747–754.
- 744 Pinheiro, J., Bates, D., DebRoy, S., & Sarkar, D. (2020). *R Core Team. 2020. nlme: linear and*  
745 *nonlinear mixed effects models. R package version 3.1-148.*
- 746 Rafiq, A., Hummel, R., Lavrentyev, V., Derry, W., Williams, D., & Merrell, R. C. (2006).  
747 Microgravity effects on fine motor skills: tying surgical knots during parabolic flight.  
748 *Aviation, Space, and Environmental Medicine*, 77(8), 852–856.
- 749 Reschke, M. F., Bloomberg, J. J., Harm, D. L., & Paloski, W. H. (1994). Space flight and  
750 neurovestibular adaptation. *Journal of Clinical Pharmacology*, 34(6), 609–617.
- 751 Reschke, M. F., Bloomberg, J. J., Harm, D. L., Paloski, W. H., Layne, C., & McDonald, V.  
752 (1998). Posture, locomotion, spatial orientation, and motion sickness as a function of space  
753 flight. *Brain Research. Brain Research Reviews*, 28(1-2), 102–117.
- 754 Reschke, M. F., Bloomberg, J. J., Paloski, W. H., Harm, D. L., & Parker, D. E. (1994).  
755 *Neurophysiologic aspects: sensory and sensorimotor function in space physiology and*  
756 *medicine*. Philadelphia: Nicogossian AE, Huntoon CL, and Pool SL. Lea & Febiger.



- 757 Reschke, M. F., Bloomberg, J. J., Paloski, W. H., Mulavara, A. P., Feiveson, A. H., & Harm, D.  
758 L. (2009). Postural reflexes, balance control, and functional mobility with long-duration  
759 head-down bed rest. *Aviation, Space, and Environmental Medicine*, 80(5 Suppl), A45–A54.
- 760 Reschke, M. F., Cohen, H. S., Cerisano, J. M., Clayton, J. A., Cromwell, R., Danielson, R. W.,  
761 Hwang, E. Y., Tingen, C., Allen, J. R., & Tomko, D. L. (2014). Effects of sex and gender on  
762 adaptation to space: neurosensory systems. *Journal of Women's Health*, 23(11), 959–962.
- 763 Reschke, M. F., Kolev, O. I., & Clément, G. (2017). Eye-Head Coordination in 31 Space Shuttle  
764 Astronauts during Visual Target Acquisition. *Scientific Reports*, 7(1), 14283.
- 765 Roberts, D. R., Zhu, X., Tabesh, A., Duffy, E. W., Ramsey, D. A., & Brown, T. R. (2015).  
766 Structural brain changes following long-term 6 head-down tilt bed rest as an analog for  
767 spaceflight. *AJNR. American Journal of Neuroradiology*, 36(11), 2048–2054.
- 768 Rothi, L. J., & Horner, J. (1983). Restitution and substitution: two theories of recovery with  
769 application to neurobehavioral treatment. *Journal of Clinical Neuropsychology*, 5(1), 73–81.
- 770 Salazar, A. P., Hupfeld, K. E., Lee, J. K., Beltran, N. E., Kofman, I. S., De Dios, Y. E., Mulder,  
771 E., Bloomberg, J. J., Mulavara, A. P., & Seidler, R. D. (2020). Neural Working Memory  
772 Changes During a Spaceflight Analog With Elevated Carbon Dioxide: A Pilot Study.  
773 *Frontiers in Systems Neuroscience*, 14, 48.
- 774 Seidler, R. D., Bernard, J. A., Burutolu, T. B., Fling, B. W., Gordon, M. T., Gwin, J. T., Kwak, Y.,  
775 & Lipps, D. B. (2010). Motor control and aging: links to age-related brain structural,  
776 functional, and biochemical effects. *Neuroscience and Biobehavioral Reviews*, 34(5), 721–  
777 733.
- 778 Shepard, S., & Metzler, D. (1988). Mental rotation: effects of dimensionality of objects and type  
779 of task. *Journal of Experimental Psychology. Human Perception and Performance*, 14(1),  
780 3–11.
- 781 Smith, M. G., Kelley, M., & Basner, M. (2020). A brief history of spaceflight from 1961 to 2020:  
782 An analysis of missions and astronaut demographics. *Acta Astronautica*, 175, 290–299.

- 783 Stahn, A. C., Gunga, H.-C., Kohlberg, E., Gallinat, J., Dinges, D. F., & Kühn, S. (2019). Brain  
784 Changes in Response to Long Antarctic Expeditions. *The New England Journal of*  
785 *Medicine*, 381(23), 2273–2275.
- 786 Strangman, G. E., Sipes, W., & Beven, G. (2014). Human cognitive performance in spaceflight  
787 and analogue environments. *Aviation, Space, and Environmental Medicine*, 85(10), 1033–  
788 1048.
- 789 Taylor, J. A., & Ivry, R. B. (2013). Implicit and explicit processes in motor learning. *Action*  
790 *Science*, 63–87.
- 791 Team, R. C. (2019). *R Foundation for Statistical Computing. R: A language and environment for*  
792 *statistical computing*. vol.
- 793 Thornton, W. E., & Rummel, J. A. (1977). *NASA Technical Reports Server (NTRS)*.  
794 [ntrs.nasa.gov](https://ntrs.nasa.gov). <https://ntrs.nasa.gov/search.jsp?R=19770026857>
- 795 Tiffin, J., & Asher, E. J. (1948). The Purdue pegboard; norms and studies of reliability and  
796 validity. *The Journal of Applied Psychology*, 32(3), 234–247.
- 797 Tombu, M., & Jolicoeur, P. (2003). A central capacity sharing model of dual-task performance.  
798 *Journal of Experimental Psychology. Human Perception and Performance*, 29(1), 3–18.
- 799 Van Ombergen, A., Jillings, S., Jeurissen, B., Tomilovskaya, E., Rumshiskaya, A., Litvinova, L.,  
800 Nosikova, I., Pechenkova, E., Rukavishnikov, I., Manko, O., Danylichev, S., Rühl, R. M.,  
801 Kozlovskaya, I. B., Sunaert, S., Parizel, P. M., Sinitsyn, V., Laureys, S., Sijbers, J., Zu  
802 Eulenburg, P., & Wuyts, F. L. (2019). Brain ventricular volume changes induced by long-  
803 duration spaceflight. *Proceedings of the National Academy of Sciences of the United*  
804 *States of America*, 116(21), 10531–10536.
- 805 Weschler, D. (1986). *Wechsler Adult Intelligence Scale--Revised UK Edition*. The Psychological  
806 Corporation: San Antonio, TX.
- 807 Witkin, H. A., & Asch, S. E. (1948). Studies in space orientation; perception of the upright in the  
808 absence of a visual field. *Journal of Experimental Psychology*, 38(5), 603–614.

- 809 Wood, S. J., Paloski, W. H., & Clark, J. B. (2015). Assessing Sensorimotor Function Following  
810 ISS with Computerized Dynamic Posturography. *Aerospace Medicine and Human*  
811 *Performance*, *86*(12 Suppl), A45–A53.
- 812 Wood, S. J., Reschke, M. F., & Owen Black, F. (2012). Continuous equilibrium scores: factoring  
813 in the time before a fall. *Gait & Posture*, *36*(3), 487–489.
- 814 Yuan, P., Koppelmans, V., Reuter-Lorenz, P. A., De Dios, Y. E., Gadd, N. E., Wood, S. J.,  
815 Riascos, R., Kofman, I. S., Bloomberg, J. J., Mulavara, A. P., & Seidler, R. D. (2016).  
816 Increased Brain Activation for Dual Tasking with 70-Days Head-Down Bed Rest. *Frontiers*  
817 *in Systems Neuroscience*, *10*, 71.
- 818
